# Supplementary material
Source: Research Square preprint supplement (doi:10.21203/rs.3.rs-9335363/v1)
Supplement: Supplementary file 1 [file cb484f6274c0cd19de4ab0a3.docx]

**Supplementary Figure A1**

Capital regulation

Cap-and-trade

Greenwashing

Capped

down-and-out call

Stakeholder engagement: equity maximization

Down-and-out call

Borrowing manufacturer: product quantity-setter

SDGs 7 and 8

Fund-providing bank: loan

rate-setter

Figure 1: A stakeholder engagement framework of greenwashing and cap-and-trade regulation through sustainable finance

**Supplementary Figure B1**


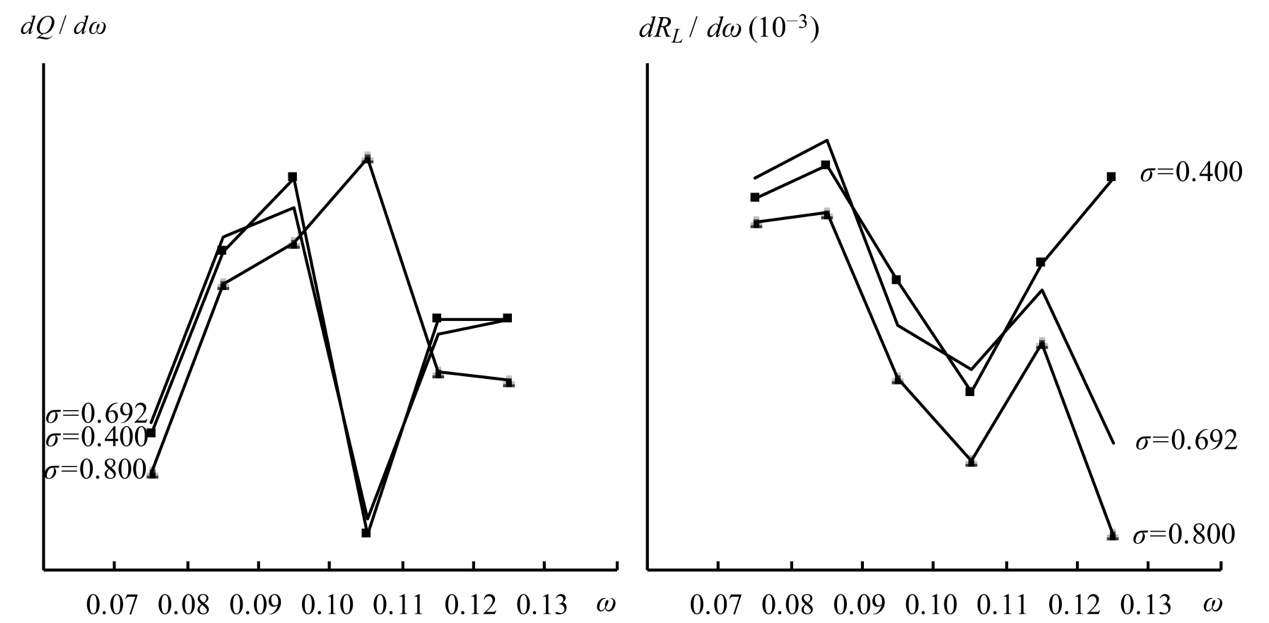


Figure B1. Graphical illustration of the impact of greenwashing on manufacturing output, loan rate, pollutant scale, and bank default probability under varying barrier levels

**Supplementary Figure B2**


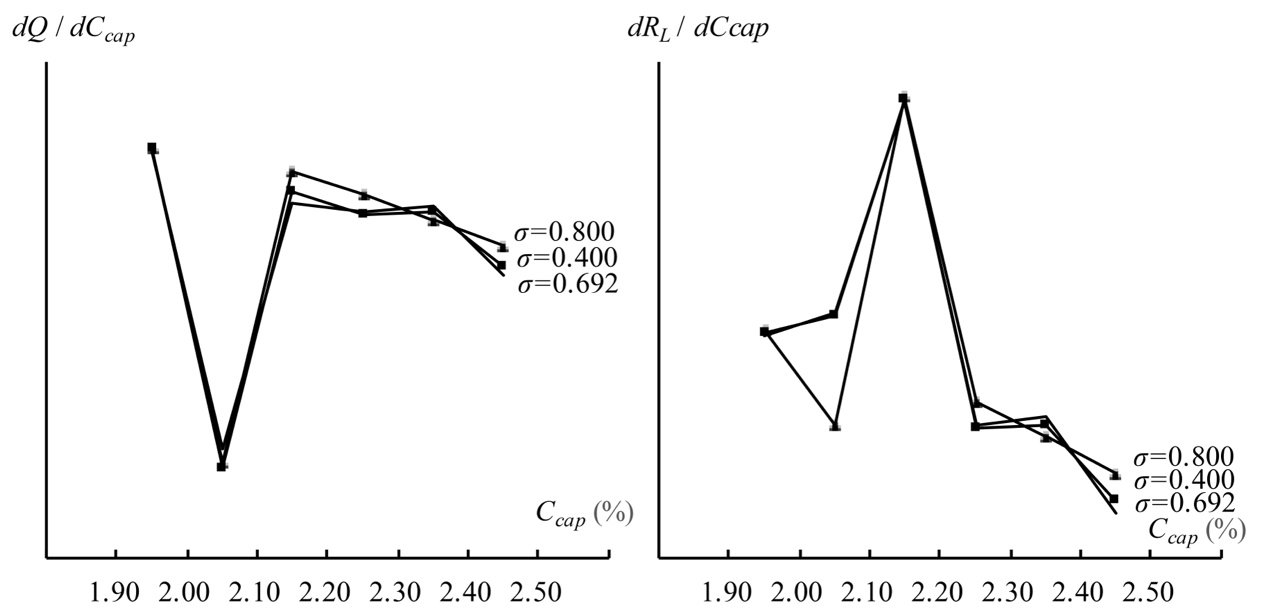


Figure B2. Graphical illustration of the impact of cap-and-trade on manufacturing output, loan rate, pollutant scale, and bank default probability under varying barrier levels

**Supplementary Figure B3**


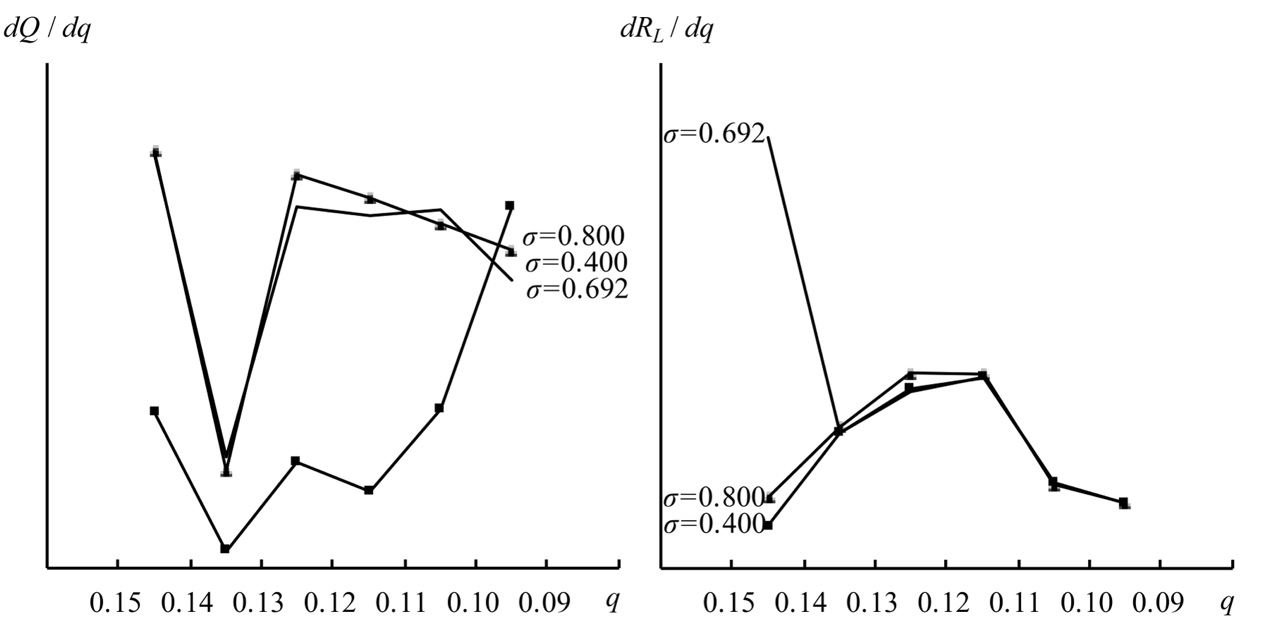


Figure B3. Graphical illustration of the impact of capital-to-deposit on manufacturing output, loan rate, pollutant scale, and bank default probability under varying barrier levels

**Supplementary Table A1**

| Table A1 | | | |
| --- | --- | --- | --- |
| Computations of , , and * | | | |
|  |  |  |  |
| 0.07→0.08 | –2.72382546 | –260654.5299 | –2723.6946 |
| 0.08→0.09 | –2.72382529 | –260654.5287 | –2723.6923 |
| 0.09→0.10 | –2.72382512 | –260654.5276 | –2723.6899 |
| 0.10→0.11 | –2.72382495 | –260654.5263 | –2723.6876 |
| 0.11→0.12 | –2.72382477 | –260654.5251 | –2723.6852 |
| 0.12→0.13 | –2.72382459 | –260654.5238 | –2723.6828 |
|  |  | (10–3) | (10–3) |
| 0.07→0.08 | –260.951712 | –6.3826 | –1.4038 |
| 0.08→0.09 | –260.951709 | –6.3823 | –1.4290 |
| 0.09→0.10 | –260.951707 | –6.3820 | –1.4545 |
| 0.10→0.11 | –260.951705 | –6.3816 | –1.4805 |
| 0.11→0.12 | –260.951703 | –6.3813 | –1.5068 |
| 0.12→0.13 | –260.951700 | –6.3809 | –1.5336 |
|  |  |  | (10–3) |
| 0.07→0.08 | –775.3123 | 2.1409 | –2.09893 |
| 0.08→0.09 | –774.7544 | 2.1422 | –2.09944 |
| 0.09→0.10 | –774.1889 | 2.1436 | –2.09997 |
| 0.10→0.11 | –773.6158 | 2.1450 | –2.10049 |
| 0.11→0.12 | –773.0349 | 2.1464 | –2.10103 |
| 0.12→0.13 | –772.4463 | 2.1478 | –2.10157 |
| * Unless otherwise indicated, see 4.1 Data baseline. | | | |

**Supplementary Table A2**

| Table A2 | | | |
| --- | --- | --- | --- |
| Computations of , , and * | | | |
| (%) |  |  |  |
| 1.90→2.00 | –2.7238 | –260654.527544 | –2723.689917 |
| 2.00→2.10 | –2.7238 | –260654.527548 | –2723.689926 |
| 2.10→2.20 | –2.7238 | –260654.527552 | –2723.689936 |
| 2.20→2.30 | –2.7238 | –260654.527556 | –2723.689945 |
| 2.30→2.40 | –2.7238 | –260654.527560 | –2723.689955 |
| 2.40→2.50 | –2.7238 | –260654.527564 | –2723.689964 |
|  |  |  | (10–4) |
| 1.90→2.00 | –260.95170720 | 0.0399994 | 0.5300 |
| 2.00→2.10 | –260.95170721 | 0.0399994 | 0.5270 |
| 2.10→2.20 | –260.95170722 | 0.0399994 | 0.5301 |
| 2.20→2.30 | –260.95170722 | 0.0399994 | 0.5290 |
| 2.30→2.40 | –260.95170723 | 0.0399994 | 0.5270 |
| 2.40→2.50 | –260.95170724 | 0.0399994 | 0.5300 |
|  |  |  |  |
| 1.90→2.00 | –774.1842 | –13.46691 | 0.0134823 |
| 2.00→2.10 | –774.1866 | –13.46687 | 0.0134822 |
| 2.10→2.20 | –774.1889 | –13.46683 | 0.0134822 |
| 2.20→2.30 | –774.1913 | –13.46679 | 0.0134821 |
| 2.30→2.40 | –774.1936 | –13.46675 | 0.0134821 |
| 2.40→2.50 | –774.1959 | –13.46671 | 0.0134821 |
| * Unless otherwise indicated, see 4.1 Data baseline. | | | |

**Supplementary Table A3**

| Table A3 | | | |
| --- | --- | --- | --- |
| Computations of , , and * | | | |
|  |  |  |  |
| 0.15→0.14 | –2.7238 | –291128.4448 | –2723.6899 |
| 0.14→0.13 | –2.7238 | –276026.3265 | –2723.6899 |
| 0.13→0.12 | –2.7238 | –260654.5276 | –2723.6899 |
| 0.12→0.11 | –2.7238 | –245005.7592 | –2723.6899 |
| 0.11→0.10 | –2.7238 | –229072.4679 | –2723.6899 |
| 0.10→0.09 | –2.7238 | –212846.8226 | –2723.6899 |
|  |  |  |  |
| 0.15→0.14 | –291.4256 | 0 | –2225.9209 |
| 0.14→0.13 | –276.3235 | 0 | –2265.3177 |
| 0.13→0.12 | –260.9517 | 0 | –2305.7698 |
| 0.12→0.11 | –245.3029 | 0 | –2347.3152 |
| 0.11→0.10 | –229.3696 | 0 | –2389.9937 |
| 0.10→0.09 | –213.1440 | 0 | –2433.8468 |
|  |  |  |  |
| 0.15→0.14 | –770.0693 | –7872.9514 | 7.8733 |
| 0.14→0.13 | –772.1109 | –7991.1100 | 7.9915 |
| 0.13→0.12 | –774.1889 | –8111.9763 | 8.1124 |
| 0.12→0.11 | –776.3044 | –8235.6342 | 8.2360 |
| 0.11→0.10 | –778.4583 | –8362.1714 | 8.3626 |
| 0.10→0.09 | –780.6518 | –8491.6789 | 8.4921 |
| * Unless otherwise indicated, see 4.1 Data baseline. | | | |

**Supplementary Text A1**

Figures B1–B3 illustrate the comparative statics under different barrier rates. The detailed numerical values, reported in the Supplementary Materials, show that the quantitative differences across barrier levels are generally small. For presentation purposes, the responses in the figures are rescaled to improve visual readability while maintaining the same qualitative relationships and economic implications. This rescaling does not alter the substantive conclusions of the analysis.
