# Supplementary material
Source: Research Square preprint supplement (doi:10.21203/rs.3.rs-9335363/v1)
Supplement: Supplementary file 2 [file e23eb4eafc729f7577828f4b.xlsx]

## Sheet: Simulation
Variables	Implications	Initial value
RL	the loan interest rate	0.046	0.047	0.048	0.049	0.05	0.051	0.052
L	the loan volume	400	399	396	391	384	375	364
K	the bank equity	50	50	50	50	50	50	50
B	the risk-default liquid assets	50	50	50	50	50	50	50
cM	the actual marginal cost of carbon emissions	0.038	0.038	0.038	0.038	0.038	0.038	0.038
μM	the manufacturer’s underlying assets with an instantaneous drift	0.15	0.15	0.15	0.15	0.15	0.15	0.15
σM	the manufacturer’s underlying assets with an instantaneous volatility	0.09	0.09	0.09	0.09	0.09	0.09	0.09
ω	the degree of greenwashing-related pollutant intensity in production	0.07	0.08	0.09	0.1	0.11	0.12	0.13
RB	the liquid-asset interest rate	0.045	0.045	0.045	0.045	0.045	0.045	0.045
δ	the barrier ratio of the knock-out value relative to total costs	0.4	0.4	0.4	0.4	0.4	0.4	0.4
RD	the deposit interest rate	0.0175	0.0175	0.0175	0.0175	0.0175	0.0175	0.0175
KM	the manufacturer equity	100	100	100	100	100	100	100
a	the intercept of the demand curve	31	31	31	31	31	31	31
F	the fixed cost	25	25	25	25	25	25	25
P	the market price	30	29.9	29.8	29.7	29.6	29.5	29.4
Q	the product quantity	10	11	12	13	14	15	16
λ	the correlation coefficient between products and pollutants	0.4	0.4	0.4	0.4	0.4	0.4	0.4
QPT	the pollutant quantity	4	4.4	4.8	5.2	5.6	6	6.4
θ	the production correlation coefficient	0.4	0.4	0.4	0.4	0.4	0.4	0.4
TC	the total manufacturing cost	188.983	218.439	250.439	284.977	322.048	361.645	403.764
TC(Q,0)		135	157	181	207	235	265	297
∂TC(Q,QPT)/∂QPT		13	14.2	15.4	16.6	17.8	19	20.2
TR	the total manufacturing revenue	300	328.9	357.6	386.1	414.4	442.5	470.4
VM	the market value of the manufacturer’s underlying assets	299.995	328.894	357.593	386.092	414.391	442.49	470.389
ωQPT	the greenwashing amount conducted by the manufacturer	0.28	0.352	0.432	0.52	0.616	0.72	0.832
d1		6.09924	5.51089	4.92173	4.33951	3.76885	3.21241	2.67158
d2		-24.34	-23.7345	-23.1282	-22.5288	-21.9411	-21.3675	-20.8097
d1-（σM+ωσM2）		6.00867	5.42024	4.831	4.2487	3.67796	3.12144	2.58053
d2-（σM+ωσM2）		-24.4306	-23.8251	-23.2189	-22.6196	-22.032	-21.4585	-20.9007
N(d1-（σM+ωσM2）)		1	1	0.999999	0.999989	0.999882	0.9991	0.995068
N(d2-（σM+ωσM2）)		4.045e-132	9.16647e-126	1.46693e-119	1.38897e-113	7.1152e-108	1.90102e-102	2.63627e-97
η	equal to (RB/(σM+ωσM2)^2+1/2)	5.98621	5.97641	5.96664	5.95689	5.94717	5.93747	5.9278
H	the value of the manufacturer’s assets that triggers bankruptcy	75.5933	87.3757	100.176	113.991	128.819	144.658	161.506
VB		197.676	228.706	262.46	298.941	338.15	380.089	424.76
ZB		125.39	159.816	197.236	237.597	280.843	326.92	375.767
c1		10.6288	8.95811	7.5539	6.34187	5.27508	4.32209	3.46082
c2		5.60267	5.00422	4.40499	3.81272	3.23205	2.66562	2.11484
c3		-19.8104	-20.2873	-20.496	-20.5265	-20.4348	-20.2579	-20.0205
c4		-24.8366	-24.2412	-23.6449	-23.0556	-22.4779	-21.9143	-21.3664
c1-（σM+ωσM2）		10.5383	8.86746	7.46317	6.25106	5.18419	4.23112	3.36976
c2-（σM+ωσM2）		5.5121	4.91357	4.31426	3.72191	3.14116	2.57465	2.02379
c3-（σM+ωσM2）		-19.901	-20.3779	-20.5867	-20.6173	-20.5257	-20.3488	-20.1115
c4-（σM+ωσM2）		-24.9272	-24.3318	-23.7356	-23.1464	-22.5688	-22.0053	-21.4575
N(C1)		1	1	1	1	1	0.999992	0.999731
N(C2)		1	1	0.999995	0.999931	0.999385	0.996158	0.982778
N(C3)		1.20977e-87	8.32889e-92	1.16853e-93	6.24722e-94	4.09906e-93	1.5141e-91	1.82702e-89
N(C4)		1.80387e-136	4.09693e-130	6.6569e-124	6.4614e-118	3.41775e-112	9.48239e-107	1.37173e-101
N(c1-（σM+ωσM2）)		1	1	1	1	1	0.999988	0.999624
N(c2-（σM+ωσM2）)		1	1	0.999992	0.999901	0.999159	0.994983	0.978504
N(c3-（σM+ωσM2）)		1.99411e-88	1.31283e-92	1.80441e-94	9.60417e-95	6.34364e-94	2.37717e-92	2.92615e-90
N(c4-（σM+ωσM2）)		1.8878e-137	4.51579e-131	7.72937e-125	7.89881e-119	4.39463e-113	1.28092e-107	1.9441e-102
b1		-15.6712	-15.0738	-14.4756	-13.8843	-13.3046	-12.7392	-12.1893
b2		-13.746	-13.1926	-12.6398	-12.0944	-11.5605	-11.0406	-10.5358
b3		-14.7681	-14.1716	-13.5743	-12.984	-12.4053	-11.8408	-11.2919
b4		-11.0654	-11.066	-11.0666	-11.0671	-11.0677	-11.0682	-11.0687
b5		-13.746	-13.1926	-12.6398	-12.0944	-11.5605	-11.0406	-10.5358
b6		-10.1623	-10.1638	-10.1653	-10.1668	-10.1683	-10.1698	-10.1713
SM	the manufacturer’s equity value	119.327	120.066	118.174	113.654	106.516	96.7776	84.5199
			0.739205	-1.89282	-4.51921	-7.1384	-9.73836	-12.2578
				-2.63202	-2.62639	-2.61919	-2.59997	-2.5194
SB	the bank’s equity value	69.106	65.8584	62.3538	58.6433	54.7679	50.7076	46.2178
			-3.24765	-3.50452	-3.71057	-3.87535	-4.06028	-4.48987
				-0.256877	-0.20605	-0.164773	-0.184934	-0.429591
PS	the pollutant-specific economies of scale	1.03814	0.983341	0.939381	0.90335	0.873273	0.847768	0.825838
BPB	the equity valuation generates a risk-neutral probability of failure over a one-period horizon	2.14405e-06	3.72853e-06	6.48094e-06	1.11817e-05	1.907e-05	3.20737e-05	5.31342e-05
Variables		Values for Static Comparative Analyses (Bold for initial values)
ω	the degree of greenwashing-related pollutant intensity in production	0.07	0.08	0.09	0.1	0.11	0.12	0.13
CCAP	the regulatory cap of the cap-and-trade scheme	0.019	0.02	0.021	0.022	0.023	0.024	0.025
q	the capital-to-deposit ratio	0.15	0.14	0.13	0.12	0.11	0.1	0.09
Variables		The varying barrier levels
δ			0.4		0.692		0.8
